# Supplementary material for: Factors Associated with Death during Tuberculosis Treatment of Patients Co-Infected with HIV at the Yaoundé Central Hospital, Cameroon: An 8-Year Hospital-Based Retrospective Cohort Study (2006–2013)
Source: PubMed Central journal article supplement (PMC4266669; doi:10.1371/journal.pone.0115211), 2014-12-15
Supplement: pone.0115211.s002.pdf [file pone.0115211.s002.pdf]

**Data S2. Data of the 337 patients included in the study**

| N° | Year of TB diagnosis | Sex    | Age (Years) | Last level education | Marital status | Area of habitation | Clinical presentation            | Status of TB at diagnosis | Duration of known HIV infected (Years) | Body weight (Kgs) | Presence of another Comorbidity non-AIDS defining | Presence of AIDS defining disease (other than TB) | White Blood Cell Count (/mm3) | Hemoglobin level (g/dl) | Lymphocyte T4 count (/mm3) | Outcomes | Life duration during 6 months period follow-up (months) | Taking cotrimoxazole prophylactic therapy | Taking combined antiretroviral therapy |
|----|----------------------|--------|-------------|----------------------|----------------|--------------------|----------------------------------|---------------------------|----------------------------------------|-------------------|---------------------------------------------------|---------------------------------------------------|-------------------------------|-------------------------|----------------------------|----------|---------------------------------------------------------|-------------------------------------------|----------------------------------------|
| 1  | 2006                 | Female | 35          | Secondary            | Single         | Urban              | Extra Pulmonary TB only          | New case                  | .0877                                  | 45                | No                                                | No                                                | 5400                          | 7                       | 12                         | Died     | .03                                                     | Yes                                       | Yes                                    |
| 2  | 2009                 | Female | 30          | Secondary            | Single         | Urban              | Extra Pulmonary TB only          | New case                  | .2521                                  | 52                | No                                                | Yes                                               | 23000                         | 3                       | 24                         | Died     | .03                                                     | No                                        | Yes                                    |
| 3  | 2009                 | Male   | 55          | University           | Married        | Rural              | Extra Pulmonary TB only          | New case                  | .6356                                  | 53                | No                                                | No                                                | 6000                          | 8                       | 48                         | Died     | .03                                                     | No                                        | Yes                                    |
| 4  | 2013                 | Male   | 30          | Primary              | Single         | Rural              | Smear-negative Pulmonary TB only | New case                  | .0740                                  | 53                | No                                                | No                                                | 3900                          | 9                       | 125                        | Died     | .03                                                     | No                                        | Yes                                    |
| 5  | 2006                 | Female | 37          | University           | Married        | Urban              | Smear-Positive Pulmonary TB only | New case                  | .0219                                  | 52                | No                                                | Yes                                               | 4200                          | 4                       | 2                          | Died     | .03                                                     | Yes                                       | Yes                                    |
| 6  | 2006                 | Female | 50          | Secondary            | Widow          | Urban              | Extra Pulmonary TB only          | New case                  | .0630                                  | 85                | No                                                | No                                                | 5800                          | 9                       | 12                         | Died     | .07                                                     | Yes                                       | Yes                                    |
| 7  | 2008                 | Female | 48          | Secondary            | Single         | Urban              | Extra Pulmonary TB only          | New case                  | .1644                                  | 47                | No                                                | No                                                | 14500                         | 11                      | 13                         | Died     | .07                                                     | No                                        | No                                     |
| 8  | 2009                 | Male   | 38          | Secondary            | Single         | Urban              | Extra Pulmonary TB only          | New case                  | .0164                                  | 45                | No                                                | No                                                | 2300                          | 8                       | 42                         | Died     | .07                                                     | Yes                                       | Yes                                    |
| 9  | 2009                 | Female | 37          | Primary              | Single         | Urban              | Extra Pulmonary TB only          | New case                  | .6740                                  | 57                | No                                                | No                                                | 5500                          | 12                      | 120                        | Died     | .07                                                     | Yes                                       | Yes                                    |
| 10 | 2009                 | Female | 31          | University           | Single         | Urban              | Extra Pulmonary TB only          | New case                  | .0027                                  | 50                | No                                                | No                                                | 4100                          | 8                       | 172                        | Died     | .07                                                     | Yes                                       | No                                     |
| 11 | 2009                 | Male   | 50          | Secondary            | Married        | Rural              | Extra Pulmonary TB only          | New case                  | 1.7726                                 | 49                | No                                                | No                                                | 8700                          | 8                       | 500                        | Died     | .07                                                     | No                                        | No                                     |
| 12 | 2006                 | Female | 34          | Secondary            | Single         | Urban              | Smear-negative Pulmonary TB only | New case                  | .0384                                  | 55                | No                                                | No                                                | 7360                          | 6                       | 146                        | Died     | .07                                                     | Yes                                       | Yes                                    |
| 13 | 2009                 | Female | 30          | Primary              | Single         | Rural              | Smear-negative Pulmonary TB only | New case                  | .1589                                  | 40                | No                                                | Yes                                               | 2290                          | 8                       | 13                         | Died     | .07                                                     | Yes                                       | Yes                                    |
| 14 | 2007                 | Male   | 35          | Primary              | Single         | Urban              | Smear-Positive Pulmonary TB only | New case                  | .0329                                  | 39                | No                                                | No                                                | 3300                          | 6                       | 75                         | Died     | .07                                                     | Yes                                       | Yes                                    |
| 15 | 2010                 | Male   | 28          | University           | Single         | Urban              | Smear-Positive Pulmonary TB only | New case                  | .1205                                  | 60                | No                                                | No                                                | 3980                          | 9                       | 168                        | Died     | .07                                                     | Yes                                       | Yes                                    |
| 16 | 2012                 | Male   | 64          | Secondary            | Married        | Urban              | Smear-Positive Pulmonary TB only | New case                  | .0384                                  | 62                | No                                                | Yes                                               | 5150                          | 11                      | 251                        | Died     | .07                                                     | No                                        | No                                     |
| 17 | 2013                 | Female | 34          | Primary              | Single         | Urban              | Smear-Positive Pulmonary TB only | New case                  | .0712                                  | 48                | No                                                | No                                                | 4860                          | 8                       | 156                        | Died     | .07                                                     | Yes                                       | Yes                                    |
| 18 | 2006                 | Female | 26          | No formal            | Single         | Urban              | Extra Pulmonary TB only          | New case                  | .0082                                  | 36                | No                                                | No                                                | 11000                         | 7                       | 14                         | Died     | .10                                                     | No                                        | No                                     |
| 19 | 2006                 | Female | 25          | Secondary            | Single         | Rural              | Extra Pulmonary TB only          | New case                  | .0438                                  | 44                | Yes                                               | No                                                | 9370                          | 6                       | 104                        | Died     | .10                                                     | Yes                                       | Yes                                    |
| 20 | 2011                 | Male   | 51          | University           | Single         | Urban              | Extra Pulmonary TB only          | Retreatment case          | 1.5562                                 | 45                | Yes                                               | No                                                | 2300                          | 7                       | 12                         | Died     | .10                                                     | Yes                                       | Yes                                    |
| 21 | 2011                 | Male   | 58          | University           | Married        | Urban              | Extra Pulmonary TB only          | New case                  | .0000                                  | 52                | No                                                | Yes                                               | 6000                          | 8                       | 41                         | Died     | .10                                                     | Yes                                       | No                                     |
| 22 | 2009                 | Male   | 42          | Secondary            | Single         | Urban              | Smear-negative Pulmonary TB only | New case                  | .1507                                  | 38                | No                                                | No                                                | 1600                          | 6                       | 4                          | Died     | .10                                                     | Yes                                       | Yes                                    |
| 23 | 2007                 | Female | 33          | University           | Single         | Rural              | Smear-Positive Pulmonary TB only | New case                  | .0219                                  | 47                | No                                                | No                                                | 13900                         | 2                       | 59                         | Died     | .10                                                     | Yes                                       | No                                     |
| 24 | 2008                 | Female | 35          | Secondary            | Single         | Urban              | Smear-Positive Pulmonary TB only | New case                  | .0219                                  | 42                | No                                                | No                                                | 11600                         | 5                       | 97                         | Died     | .10                                                     | Yes                                       | No                                     |
| 25 | 2011                 | Female | 36          | Secondary            | Married        | Rural              | Smear-Positive Pulmonary TB only | New case                  | .3041                                  | .                 | No                                                | No                                                | .                             | .                       | .                          | Died     | .10                                                     | No                                        | No                                     |
| 26 | 2007                 | Male   | 37          | Primary              | Married        | Urban              | Mixed Form                       | New case                  | .0548                                  | 62                | No                                                | Yes                                               | 10300                         | 8                       | 15                         | Died     | .13                                                     | Yes                                       | Yes                                    |
| 27 | 2006                 | Male   | 54          | Secondary            | Married        | Urban              | Extra Pulmonary TB only          | Retreatment case          | .0055                                  | 84                | No                                                | Yes                                               | 17000                         | 8                       | 4                          | Died     | .13                                                     | No                                        | Yes                                    |
| 28 | 2007                 | Female | 27          | No formal            | Single         | Urban              | Extra Pulmonary TB only          | New case                  | .2000                                  | 37                | No                                                | No                                                | 8300                          | 2                       | 34                         | Died     | .13                                                     | Yes                                       | Yes                                    |
| 29 | 2011                 | Female | 28          | University           | Single         | Urban              | Extra Pulmonary TB only          | New case                  | .0000                                  | .                 | No                                                | No                                                | .                             | .                       | .                          | Died     | .13                                                     | No                                        | No                                     |
| 30 | 2010                 | Male   | 33          | Primary              | Married        | Urban              | Smear-Positive Pulmonary TB only | New case                  | .0055                                  | 48                | No                                                | No                                                | 31100                         | 8                       | 11                         | Died     | .13                                                     | No                                        | No                                     |
| 31 | 2013                 | Female | 25          | Primary              | Single         | Urban              | Smear-Positive Pulmonary TB only | New case                  | .0301                                  | 72                | No                                                | No                                                | 4320                          | 7                       | 124                        | Died     | .13                                                     | No                                        | Yes                                    |
| 32 | 2008                 | Male   | 46          | Secondary            | Married        | Urban              | Mixed Form                       | Retreatment case          | .0000                                  | 42                | Yes                                               | No                                                | 2300                          | 5                       | 42                         | Died     | .17                                                     | No                                        | No                                     |
| 33 | 2006                 | Male   | 33          | Secondary            | Single         | Urban              | Extra Pulmonary TB only          | New case                  | .0000                                  | 49                | No                                                | Yes                                               | 3200                          | 10                      | 40                         | Died     | .17                                                     | Yes                                       | Yes                                    |
| 34 | 2006                 | Male   | 41          | University           | Married        | Urban              | Extra Pulmonary TB only          | New case                  | .0192                                  | 63                | No                                                | No                                                | 3200                          | 7                       | 46                         | Died     | .17                                                     | No                                        | Yes                                    |
| 35 | 2007                 | Female | 37          | Secondary            | Single         | Urban              | Extra Pulmonary TB only          | New case                  | .1452                                  | 37                | No                                                | No                                                | 2700                          | 9                       | 25                         | Died     | .17                                                     | Yes                                       | No                                     |
| 36 | 2011                 | Female | 42          | No formal            | Widow          | Urban              | Extra Pulmonary TB only          | New case                  | .2137                                  | 50                | No                                                | No                                                | 1900                          | 9                       | 92                         | Died     | .17                                                     | Yes                                       | Yes                                    |
| 37 | 2006                 | Female | 33          | Secondary            | Single         | Urban              | Smear-negative Pulmonary TB only | New case                  | .0301                                  | 41                | Yes                                               | No                                                | 8490                          | 6                       | 7                          | Died     | .17                                                     | No                                        | No                                     |
| 38 | 2007                 | Female | 36          | University           | Single         | Urban              | Smear-Positive Pulmonary TB only | New case                  | .3781                                  | 64                | No                                                | No                                                | 6000                          | 6                       | 48                         | Died     | .17                                                     | Yes                                       | Yes                                    |
| 39 | 2009                 | Male   | 50          | University           | Married        | Urban              | Mixed Form                       | New case                  | .0000                                  | 78                | Yes                                               | Yes                                               | 2010                          | 10                      | 4                          | Died     | .20                                                     | Yes                                       | Yes                                    |
| 40 | 2007                 | Male   | 40          | Secondary            | Married        | Urban              | Extra Pulmonary TB only          | New case                  | .0082                                  | 48                | No                                                | No                                                | 6600                          | 4                       | 181                        | Died     | .20                                                     | Yes                                       | Yes                                    |
| 41 | 2007                 | Male   | 34          | No formal            | Single         | Urban              | Extra Pulmonary TB only          | New case                  | .0438                                  | 40                | No                                                | No                                                | .                             | .                       | 297                        | Died     | .20                                                     | Yes                                       | No                                     |
| 42 | 2009                 | Male   | 53          | No formal            | Single         | Urban              | Extra Pulmonary TB only          | New case                  | .4329                                  | 48                | No                                                | No                                                | 2100                          | 8                       | 14                         | Died     | .20                                                     | No                                        | No                                     |
| 43 | 2012                 | Male   | 38          | Primary              | Married        | Urban              | Extra Pulmonary TB only          | New case                  | .0055                                  | 52                | Yes                                               | No                                                | 9900                          | 15                      | 51                         | Died     | .20                                                     | Yes                                       | Yes                                    |
| 44 | 2008                 | Male   | 35          | University           | Single         | Rural              | Smear-negative Pulmonary TB only | New case                  | .0192                                  | .                 | No                                                | No                                                | 11100                         | 11                      | 45                         | Died     | .20                                                     | Yes                                       | No                                     |
| 45 | 2010                 | Female | 78          | Secondary            | Widow          | Urban              | Smear-Positive Pulmonary TB only | New case                  | .0356                                  | 52                | No                                                | No                                                | 3260                          | 10                      | 49                         | Died     | .20                                                     | No                                        | No                                     |
| 46 | 2012                 | Male   | 48          | Secondary            | Married        | Urban              | Smear-Positive Pulmonary TB only | New case                  | .0000                                  | 30                | Yes                                               | No                                                | 3700                          | 8                       | 11                         | Died     | .20                                                     | Yes                                       | Yes                                    |
| 47 | 2009                 | Male   | 35          | University           | Single         | Urban              | Mixed Form                       | New case                  | .0904                                  | .                 | No                                                | No                                                | 4700                          | 12                      | .                          | Died     | .23                                                     | Yes                                       | Yes                                    |
| 48 | 2013                 | Female | 35          | Secondary            | Single         | Urban              | Extra Pulmonary TB only          | New case                  | 5.6603                                 | 38                | No                                                | No                                                | 29100                         | 5                       | 108                        | Died     | .23                                                     | Yes                                       | No                                     |
| 49 | 2006                 | Male   | 46          | Secondary            | Married        | Urban              | Extra Pulmonary TB only          | New case                  | .1342                                  | 52                | No                                                | Yes                                               | 25000                         | 9                       | 275                        | Died     | .27                                                     | No                                        | Yes                                    |
| 50 | 2007                 | Male   | 29          | No formal            | Single         | Rural              | Extra Pulmonary TB only          | New case                  | .1671                                  | 55                | No                                                | No                                                | 1000                          | 5                       | 37                         | Died     | .27                                                     | Yes                                       | Yes                                    |
| 51 | 2010                 | Male   | 45          | University           | Married        | Urban              | Smear-Positive Pulmonary TB only | Retreatment case          | 3.2767                                 | 63                | No                                                | No                                                | 3900                          | 10                      | 8                          | Died     | .27                                                     | Yes                                       | Yes                                    |
| 52 | 2009                 | Male   | 50          | Secondary            | Divorced       | Urban              | Smear-negative Pulmonary TB only | New case                  | .3096                                  | 50                | No                                                | No                                                | 900                           | 9                       | 174                        | Died     | .30                                                     | Yes                                       | Yes                                    |
| 53 | 2009                 | Female | 65          | Primary              | Married        | Urban              | Extra Pulmonary TB only          | New case                  | .0000                                  | 54                | No                                                | Yes                                               | .                             | .                       | .                          | Died     | .33                                                     | Yes                                       | Yes                                    |
| 54 | 2008                 | Female | 26          | Secondary            | Single         | Urban              | Smear-Positive Pulmonary TB only | New case                  | .3616                                  | 37                | No                                                | Yes                                               | 4000                          | 6                       | 6                          | Died     | .33                                                     | Yes                                       | Yes                                    |
| 55 | 2013                 | Male   | 53          | Primary              | Married        | Urban              | Smear-Positive Pulmonary TB only | New case                  | .8247                                  | 42                | No                                                | No                                                | 2430                          | 6                       | 27                         | Died     | .33                                                     | Yes                                       | Yes                                    |
| 56 | 2013                 | Female | 51          | Secondary            | Widow          | Urban              | Smear-Positive Pulmonary TB only | Retreatment case          | 1.7315                                 | 43                | Yes                                               | No                                                | 1700                          | 9                       | 163                        | Died     | .33                                                     | No                                        | Yes                                    |
| 57 | 2007                 | Female | 40          | University           | Married        | Urban              | Extra Pulmonary TB only          | New case                  | .0247                                  | 55                | No                                                | Yes                                               | 8600                          | 9                       | 151                        | Died     | .37                                                     | Yes                                       | No                                     |
| 58 | 2006                 | Male   | 34          | Secondary            | Married        | Urban              | Extra Pulmonary TB only          | New case                  | .0055                                  | 48                | No                                                | Yes                                               | 4910                          | 10                      | 9                          | Died     | .40                                                     | Yes                                       | No                                     |
| 59 | 2006                 | Male   | 50          | University           | Married        | Urban              | Smear-negative Pulmonary TB only | Retreatment case          | 1.6904                                 | 47                | No                                                | No                                                | 7550                          | 8                       | 48                         | Died     | .40                                                     | Yes                                       | Yes                                    |
| 60 | 2009                 | Male   | 43          | Secondary            | Married        | Urban              | Smear-negative Pulmonary TB only | New case                  | .0438                                  | 55                | No                                                | Yes                                               | 5610                          | 12                      | 138                        | Died     | .40                                                     | Yes                                       | No                                     |
| 61 | 2008                 | Male   | 44          | Secondary            | Married        | Rural              | Smear-negative Pulmonary TB only | Retreatment case          | 6.3315                                 | 48                | No                                                | No                                                | 8100                          | 7                       | 1                          | Died     | .43                                                     | Yes                                       | No                                     |
| 62 | 2008                 | Male   | 25          | Secondary            | Married        | Rural              | Smear-negative Pulmonary TB only | New case                  | .0301                                  | 56                | No                                                | No                                                | 3700                          | 11                      | 33                         | Died     | .43                                                     | No                                        | No                                     |
| 63 | 2006                 | Female | 43          | No formal            | Widow          | Urban              | Smear-Positive Pulmonary TB only | New case                  | .0274                                  | 55                | No                                                | No                                                | 3000                          | 5                       | 15                         | Died     | .43                                                     | Yes                                       | Yes                                    |
| 64 | 2008                 | Male   | 39          | Primary              | Married        | Urban              | Extra Pulmonary TB only          | New case                  | .0247                                  | 58                | No                                                | No                                                | 1500                          | 6                       | 56                         | Died     | .47                                                     | Yes                                       | Yes                                    |
| 65 | 2007                 | Male   | 43          | Secondary            | Widow          | Urban              | Extra Pulmonary TB only          | New case                  | 5.8110                                 | 38                | No                                                | No                                                | 1500                          | 8                       | 35                         | Died     | .50                                                     | Yes                                       | Yes                                    |
| 66 | 2007                 | Male   | 44          | University           | Married        | Urban              | Extra Pulmonary TB only          | New case                  | .3288                                  | 45                | No                                                | No                                                | 2200                          | 9                       | 43                         | Died     | .50                                                     | Yes                                       | Yes                                    |
| 67 | 2013                 | Female | 48          | University           | Married        | Urban              | Smear-negative Pulmonary TB only | Retreatment case          | 1.3836                                 | 56                | Yes                                               | No                                                | 3100                          | 5                       | 53                         | Died     | .57                                                     | Yes                                       | Yes                                    |
| 68 | 2006                 | Female | 25          | Secondary            | Single         | Rural              | Extra Pulmonary TB only          | New case                  | .0603                                  | .                 | No                                                | No                                                | 4200                          | 7                       | 187                        | Died     | .60                                                     | No                                        | No                                     |
| 69 | 2012                 | Male   | 52          | University           | Married        | Urban              | Extra Pulmonary TB only          | New case                  | .1096                                  | 74                | No                                                | Yes                                               | 4080                          | 8                       | 25                         | Died     | .60                                                     | No                                        | Yes                                    |
| 70 | 2006                 | Female | 35          | Secondary            | Single         | Urban              | Extra Pulmonary TB only          | New case                  | .0000                                  | 48                | No                                                | No                                                | 3540                          | 4                       | 58                         | Died     | .67                                                     | Yes                                       | Yes                                    |
| 71 | 2010                 | Female | 44          | Primary              | Married        | Urban              | Smear-negative Pulmonary TB only | New case                  | .0164                                  | 44                | No                                                | Yes                                               | 8000                          | 3                       | 50                         | Died     | .70                                                     | No                                        | No                                     |
| 72 | 2006                 | Male   | 52          | University           | Married        | Urban              | Extra Pulmonary TB only          | New case                  | .0000                                  | 52                | No                                                | No                                                | 5400                          | 6                       | 281                        | Died     | .77                                                     | No                                        | No                                     |
| 73 | 2007                 | Female | 46          | No formal            | Single         | Urban              | Smear-negative Pulmonary TB only | New case                  | .0000                                  | 39                | Yes                                               | No                                                | 4090                          | 6                       | 21                         | Died     | .77                                                     | Yes                                       | Yes                                    |
| 74 | 2011                 | Female | 60          | Primary              | Married        | Urban              | Smear-negative Pulmonary TB only | Retreatment case          | 1.2356                                 | 54                | Yes                                               | Yes                                               | 54200                         | 9                       | 35                         | Died     | .77                                                     | No                                        | Yes                                    |
| 75 | 2006                 | Female | 23          | University           | Single         | Urban              | Mixed Form                       | New case                  | .0658                                  | 42                | No                                                | Yes                                               | 630                           | 5                       | 22                         | Died     | .83                                                     | Yes                                       | No                                     |
| 76 | 2008                 | Female | 45          | University           | Single         | Urban              | Smear-Positive Pulmonary TB only | New case                  | .0000                                  | 42                | Yes                                               | No                                                | 7800                          | 8                       | 42                         | Died     | .90                                                     | No                                        | No                                     |
| 77 | 2008                 | Male   | 24          | Secondary            | Single         | Urban              | Mixed Form                       | New case                  | .2959                                  | .                 | No                                                | No                                                | .                             | .                       | .                          | Died     | .97                                                     | No                                        | No                                     |
| 78 | 2013                 | Female | 28          | Primary              | Single         | Urban              | Smear-Positive Pulmonary TB only | New case                  | .0110                                  | 35                | No                                                | No                                                | 9100                          | 8                       | 69                         | Died     | .97                                                     | No                                        | Yes                                    |









|     |      |        |     |            |         |       |                                  |          |        |     |     |     |      |     |     |                     |      |     |     |
|-----|------|--------|-----|------------|---------|-------|----------------------------------|----------|--------|-----|-----|-----|------|-----|-----|---------------------|------|-----|-----|
| 334 | 2013 | Female | 31  | University | Single  | Urban | Smear-Positive Pulmonary TB only | New case | .3781  | 48  | No  | No  | 5400 | 11  | 54  | Completed treatment | 6.00 | Yes | Yes |
| 335 | 2013 | Female | 32  | No formal  | Single  | Urban | Smear-Positive Pulmonary TB only | New case | 3.0301 | 58  | No  | Yes | 2700 | 6   | 118 | Completed treatment | 6.00 | Yes | Yes |
| 336 | 2013 | Female | 30  | No formal  | Single  | Urban | Smear-Positive Pulmonary TB only | New case | .7890  | 45  | No  | No  | 7600 | 8   | 142 | Completed treatment | 6.00 | Yes | No  |
| 337 | 2013 | Male   | 51  | Primary    | Married | Rural | Smear-Positive Pulmonary TB only | New case | .0000  | 62  | No  | No  | 2300 | 7   | 184 | Completed treatment | 6.00 | No  | No  |
| N   | 337  | 337    | 337 | 337        | 337     | 337   | 337                              | 337      | 337    | 301 | 337 | 337 | 319  | 319 | 309 | 337                 | 337  | 337 | 337 |

TB: tuberculosis

Mixed form: Extra-pulmonary TB + Pulmonary TB
